# Supplementary material for: Observational study of administering intranasal steroid sprays by healthcare workers
Source: PubMed Central journal article supplement — BMJ Open. 2020 Aug 30;10(8):e037660. doi: 10.1136/bmjopen-2020-037660 (PMC7462155; doi:10.1136/bmjopen-2020-037660), 2020-08-30
Supplement: bmjopen-2020-037660.draft_revisions.pdf [file bmjopen-2020-037660.draft_revisions.pdf]

# BMJ Open

BMJ Open is committed to open peer review. As part of this commitment we make the peer review history of every article we publish publicly available.

When an article is published we post the peer reviewers' comments and the authors' responses online. We also post the versions of the paper that were used during peer review. These are the versions that the peer review comments apply to.

The versions of the paper that follow are the versions that were submitted during the peer review process. They are not the versions of record or the final published versions. They should not be cited or distributed as the published version of this manuscript.

BMJ Open is an open access journal and the full, final, typeset and author-corrected version of record of the manuscript is available on our site with no access controls, subscription charges or pay-per-view fees (<http://bmjopen.bmj.com>).

If you have any questions on BMJ Open's open peer review process please email [info.bmjopen@bmj.com](mailto:info.bmjopen@bmj.com)

# BMJ Open

## Observational study of administering intranasal steroid sprays by healthcare workers

|                               |                                                                                                                                                                                                                                                                                            |
|-------------------------------|--------------------------------------------------------------------------------------------------------------------------------------------------------------------------------------------------------------------------------------------------------------------------------------------|
| Journal:                      | <i>BMJ Open</i>                                                                                                                                                                                                                                                                            |
| Manuscript ID                 | bmjopen-2020-037660                                                                                                                                                                                                                                                                        |
| Article Type:                 | Original research                                                                                                                                                                                                                                                                          |
| Date Submitted by the Author: | 11-Feb-2020                                                                                                                                                                                                                                                                                |
| Complete List of Authors:     | de Boer, Marielle; Medical Center Leeuwarden, Paediatrics<br>Rollema, Corine; Medical Center Leeuwarden, Clinical Pharmacy and Pharmacology<br>van Roon, Eric; University of Groningen, Pharmacotherapy and Pharmaceutical Care<br>Vries, Tjalling; Medical Center Leeuwarden, Paediatrics |
| Keywords:                     | Allergy < THORACIC MEDICINE, THERAPEUTICS, OTOLARYNGOLOGY                                                                                                                                                                                                                                  |
|                               |                                                                                                                                                                                                                                                                                            |

SCHOLARONE™  
Manuscripts

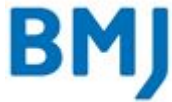

I, the Submitting Author has the right to grant and does grant on behalf of all authors of the Work (as defined in the below author licence), an exclusive licence and/or a non-exclusive licence for contributions from authors who are: i) UK Crown employees; ii) where BMJ has agreed a CC-BY licence shall apply, and/or iii) in accordance with the terms applicable for US Federal Government officers or employees acting as part of their official duties; on a worldwide, perpetual, irrevocable, royalty-free basis to BMJ Publishing Group Ltd ("BMJ") its licensees and where the relevant Journal is co-owned by BMJ to the co-owners of the Journal, to publish the Work in this journal and any other BMJ products and to exploit all rights, as set out in our [licence](#).

The Submitting Author accepts and understands that any supply made under these terms is made by BMJ to the Submitting Author unless you are acting as an employee on behalf of your employer or a postgraduate student of an affiliated institution which is paying any applicable article publishing charge ("APC") for Open Access articles. Where the Submitting Author wishes to make the Work available on an Open Access basis (and intends to pay the relevant APC), the terms of reuse of such Open Access shall be governed by a Creative Commons licence – details of these licences and which [Creative Commons](#) licence will apply to this Work are set out in our licence referred to above.

Other than as permitted in any relevant BMJ Author's Self Archiving Policies, I confirm this Work has not been accepted for publication elsewhere, is not being considered for publication elsewhere and does not duplicate material already published. I confirm all authors consent to publication of this Work and authorise the granting of this licence.

1  
2  
3 Title: Observational study of administering intranasal steroid sprays by healthcare workers  
4  
5  
6

7 Mariëlle de Boer,<sup>1</sup> Corine Rollema,<sup>2</sup> Eric N van Roon,<sup>3</sup> Tjalling W de Vries<sup>4</sup>  
8  
9

10 1 Mariëlle de Boer, medical student, Faculty of medical sciences, University of Groningen,  
11 Groningen, the Netherlands; E-mail: marielle.de.boer@hotmail.com  
12

13 2 Corine Rollema, MSc, pharmacist. Department of Clinical Pharmacy and Pharmacology, Medical  
14 Centre Leeuwarden, Leeuwarden, the Netherlands; E-mail: corine.rollema@znb.nl  
15  
16

17 3 Prof.dr. Eric van Roon, MSc, Ph.D., Department of Clinical Pharmacy and Pharmacology, Medical  
18 Centre Leeuwarden, Leeuwarden, the Netherlands; Groningen Research Institute of Pharmacy,  
19 Department Pharmacotherapy, Epidemiology and Economy, University of Groningen, Groningen, the  
20 Netherlands. E-mail: e.n.van.roon@znb.nl  
21  
22

23 4 Tjalling de Vries, M.D., Ph.D., paediatrician. Department of Paediatrics, Medical Centre  
24 Leeuwarden, Leeuwarden, the Netherlands. E-mail: tjalling.de.vries@znb.nl  
25  
26

27 Corresponding author: Tjalling de Vries, Department of Paediatrics, Medical Centre Leeuwarden, the  
28 Netherlands. Tel: ++ 31 58 286 3385; fax ++ 31 58 286 3390, E-mail: tjalling.de.vries@znb.nl  
29  
30  
31  
32  
33  
34  
35  
36

37 Keywords: Intranasal corticosteroid sprays, allergic rhinitis, administration techniques, quality of  
38 administration, healthcare workers  
39  
40  
41

42 Word counts:  
43

44 Total word count: 4000  
45

46 Word count text: 2000  
47  
48  
49  
50  
51  
52  
53  
54  
55  
56  
57  
58  
59  
60

## Abstract

Objectives: Patients with allergic rhinitis receive their information about administering intranasal corticosteroid sprays (INCS) from healthcare workers. Since the majority of patients do not administer these sprays correctly, we investigated whether healthcare workers know how to administer INCS.

Settings: we studied participants at their working place: pharmacy, outpatient clinic, or general practitioner centre for emergencies

Participants: pharmacist assistants, general practitioners, paediatricians, and ear nose throat doctors.

Design: observational study

Primary outcome: number of steps of administration of INCS, based on the established INCS protocol

Secondary outcome: number of the five steps that are labelled essential to obtain optimal distribution of the medication. All the participants demonstrated the administration technique with a spray device filled with water.

Results: Among the 75 participants, none performed all the steps correctly. The median of correctly performed steps in the protocol was 14 out of 29. A significantly better result was found among the pharmacist assistants. The essential steps were performed by 27 out of the 75 participants (36%).

Conclusion: The majority of healthcare workers do not know how to administer INCS correctly.

Patients could, therefore, receive incorrect and non-uniform instructions. The education of healthcare workers on how to administer INCS correctly may be an option for improvement

## Article Summary

### Strengths and limitations of this study

In this study we observed how healthcare workers, including general practitioners, ear nose throat doctors, paediatricians, and pharmacy assistants administered intranasal corticosteroid sprays (INCS).

This is the first study to observe healthcare workers administering INCS.

The administration technique was scored in a simple and robust way by the same investigator.

We used a protocol for correct administration on literature and patient information leaflets, however, not all steps are based on firm scientific evidence.

We do not know if administration of INCS depends on the instructions given by healthcare workers.

## Introduction

Allergic rhinitis is a common chronic disease, with a prevalence ranging from 10 to 40% worldwide.<sup>1-2</sup> The disease mostly affects people between 5 and 45 years old, with a peak incidence between 19 and 24 years old.<sup>3</sup> In addition to allergen avoidance, the management of allergic rhinitis consists of either antihistamines, intranasal corticosteroids or a combination of both.<sup>4-5</sup> When persistent symptoms occur, intranasal corticosteroid sprays (INCS) are the treatment of choice.<sup>6-7</sup> Studies suggest that the administration technique for INCS is associated with efficacy, adverse events and compliance.<sup>5,8</sup> For example, it was found that the optimal administration technique of INCS is spraying with a contralateral spray technique, pointing the nozzle away from the septum, because spraying towards the septum causes more nosebleeds than the recommended approach.<sup>8-10</sup> Furthermore, the head should be kept in a neutral position, and it is important to breathe in calmly while spraying. This technique provides the best distribution of the medication.<sup>11-13</sup> In a recent study, we observed the method of administration among patients and found that most (94%) did not take their INCS as described in the patient information leaflets (PILs).<sup>14</sup> Moreover, the available PILs are currently incomplete and non-uniform.<sup>15</sup> Since patients do not only learn from PILs, but can also be instructed by healthcare workers, we wanted to know whether such they could demonstrate the administration of INCS correctly. As far as we know, this factor has never previously been studied. Therefore, we investigated the knowledge of healthcare workers regarding administering INCS.

## Material and methods

### Participants and setting

We performed an observational study in the northern part of the Netherlands. The healthcare workers observed included pharmacist assistants, general practitioners, paediatricians, and ENT physicians. Healthcare workers were excluded if they had been practising their profession for less than a year. Paediatricians and ENT physicians from eight hospitals were approached via email. We approached pharmacist assistants from six pharmacies. General practitioners were approached while working at the general practitioner centre for emergencies based at the Medical Centre Leeuwarden.

### Study design

When eligible healthcare workers agreed to participate, a face-to-face interview was conducted. All the participants were aware of the aim of the study. To prevent inter-observer variation, all interviews and observations were performed by the same researcher (MdB).

During the interviews, the healthcare workers answered a questionnaire containing questions about their experiences prescribing INCS and about how they provide patients with information. Then, the healthcare workers were asked to demonstrate the administration technique with a spray device filled with water. The stages assessed were preparation, administration and cleaning of the INCS [Table 1]. Assessment of the administration technique was based on the established Dutch INCS protocol. In this protocol, five steps are labelled as essential.<sup>14</sup> These steps are considered as essential because they most influence the distribution and efficacy of the medication. The essential steps include shaking the bottle, blowing or rinsing the nose, directing the nebuliser away from the nasal septum, breathing in while simultaneously squirting a spray of mist, and exhaling through the mouth.

In the statistical analysis, descriptive statistics were used to answer the question of whether healthcare workers know how to administer INCS. For the comparison of outcomes between populations, a Pearson correlation was used for continuous variables, a Spearman rho correlation for ordinal variables, and a Mann-Whitney U Test for categorical variables. The regional medical ethics committee approved the study protocol. All the participants provided written consent.

## Patient and Public Involvement

Patients or the public WERE NOT involved in the design, or conduct, or reporting, or dissemination plans of our research.

## Results

In the period between June 11<sup>th</sup> and December 18<sup>th</sup>, 2019, 75 healthcare workers participated in our study [Table 2], none of whom performed all the steps correctly. The median of correctly performed steps in the protocol was 14 out of 29, with a range between 9 and 24 and an interquartile range of 3.5. For preparing the spray, the median was six out of seven steps. The median for administering the spray was eight out of 10 steps, and the median for cleaning the spray was one out of 10 steps. The points for attention, which are taking the spray to the pharmacy when it does not work and checking the expiry date, were not performed by most participants [Figure 1]. When analysing the differences in total score between the healthcare workers, a significantly higher result was found among pharmacist assistants compared with the other groups [Table 3].

Twenty-seven out of 75 participants (36%) performed all the essential steps. Of the essential steps, nose-blowing was performed least frequently, being carried out 46 out of 75 times (61%). Inhaling while squirting a spray of mist into the open nostril was performed most often: 69 out of 75 times (92%). Shaking the bottle was done 61 times (81%). The nozzle was directed outwards 66 times (88%). Exhaling through the mouth was done by 57 participants (76%) [Table 4].

Sixteen participants (21%) performed all the preparation steps. The least performed steps during preparation were activating the nozzle by spraying in the air (59%) and blowing or rinsing the nose (61%). Two participants (3%) performed all the administration steps. Squirting the spray while breathing in (92%) and pointing the nozzle outwards (88%) were performed by most participants. The most frequent errors in administration were, in order, keeping the other nostril closed, spraying crosswise and keeping the head upright. These steps were performed 33 times (44%), 43 times (47%) and 49 times (65%), respectively. One participant (1%) performed all the cleaning steps, including cleaning the nozzle with a tissue and extensively cleaning the nozzle with water once a week and allowing it to air dry. Approximately half the participants (38; 51%) cleaned the spray with a tissue after every use [Table 4].

## Discussion

In this study we found that most healthcare workers involved in the care for patients with allergic rhinitis did not know and could not demonstrate how to administer INCS correctly. None of the healthcare workers performed all the steps of the checklist correctly. The median of the 75 participants was 14 out of 29 well-executed steps. The five essential steps were correctly performed by 27 out of 75 participants (36%). We found that the pharmacist assistants administered the INCS significantly better than the other healthcare workers, suggesting that pharmacist assistants are most suitable for providing information about INCS.

To the best of our knowledge, the role of healthcare workers in informing patients about the correct administration of INCS has never previously been studied. One recent study found that face-to-face instruction, consisting of both verbal information and a physical demonstration, was most effective in teaching the correct technique for asthma medication.<sup>16</sup> This finding may apply regarding the correct usage of INCS as well, meaning that it is important that healthcare workers have sufficient knowledge. Knowledge about inhaler technique for asthma and chronic obstructive pulmonary disease (COPD) has been researched using healthcare workers. These studies reveal similar results to ours; that is, inadequate knowledge regarding the use of inhalers.<sup>17-18</sup> A recent study found only 12% of

1  
2  
3 healthcare workers knew at least three essential steps of the correct metered-dose inhaler technique,  
4 and none of the participants performed all the steps correctly.<sup>19</sup>  
5 For the checklist, we used a standardised protocol recently published in Dutch healthcare. Although  
6 this protocol is based on existing literature, a few instruction steps are only marginally substantiated  
7 by research data, and we needed to make a few assumptions about the best spray technique [Table 5].  
8 First, an essential step while preparing for administration is blowing or rinsing the nose. This step is  
9 recommended in the literature, although no significantly better distribution of the active substance  
10 was found.<sup>20</sup> Approximately 60% of the participants performed this step. Next, it was found that an  
11 upright position of the head while spraying proved most effective.<sup>11,21</sup> Bending the head backwards  
12 can result in the active substance leaking into the pharynx, causing irritation and possibly more  
13 systemic uptake. When bending the head forward, the active substance could easily run out again.  
14 However, 45% of the ENT doctors and 10 to 20% of the paediatricians, general practitioners and  
15 pharmacist assistants bent their heads forward while breathing in the spray. Their reasoning was that  
16 the nasal cavity runs backwards, causing the spray to be sprayed towards the nasal cavity when the  
17 head is bent forward. There is a study that confirms this theory.<sup>13</sup> However, when administering the  
18 nasal spray, the nozzle should be directed away from the nasal septum to prevent nose bleeding and  
19 septum perforation. Furthermore, the lateral nasal wall has more cilia than the medial wall, so the  
20 distribution of the active substance is better.<sup>8-10</sup> We found that this essential step was performed  
21 correctly by 88% of the participants. It is also advised to use the contralateral hand while spraying,  
22 because this causes less mechanical irritation, and, thus, fewer side effects and better compliance.<sup>8</sup>  
23 Approximately half the participants (57%) performed this step. However, not all these participants  
24 recommended this step to their patients, because it is relatively complicated to perform. Another  
25 essential step is to breathe in slowly during administration, because the airflow ensures a better  
26 contribution of the active substance. A continuous, slow flow has the best effect. Breathing hard or  
27 sniffing can lead to increased turbulence in the nose, which can cause the active substance to finish in  
28 the pharynx.<sup>12,22</sup> This was the best performed essential step: 92% of participants performed this  
29 correctly. Only one participant stated that the nasal spray should be completely cleaned with water  
30 once a week. Since these nasal sprays are used chronically and daily in many cases, good hygiene is  
31 important. However, there is no uniform instruction for cleaning the nasal spray in the package  
32 leaflets. This lack is a possible explanation why the healthcare workers did not mention this aspect.  
33 Considering that there is little substantiated research about the correct administration technique, and  
34 since the published INCS protocol is not widely known, healthcare providers apparently provide  
35 instructions according to their own insights. Further research is necessary to substantiate the most  
36 effective administration technique for nasal sprays. Currently, it is important to implement the present  
37 available instructions to achieve clarity in the instructions for the administration of nasal sprays.  
38  
39  
40  
41  
42  
43  
44  
45

#### 46 Strengths and limitations

47 This study has a couple of limitations. First, we did not know what outcomes to expect, so we chose  
48 to conduct this research with a relatively small research group.<sup>23</sup> Second, we could only include 15  
49 ENT doctors despite many attempts and visits to their offices. We cannot explain their low  
50 participation. Nevertheless, we do not think that the inclusion of five more ENT doctors would affect  
51 the outcome significantly.  
52

53 The strengths of this study are as follows: since various hospitals, general practices and pharmacies  
54 were included, the results are a good reflection of the population that both prescribes and informs  
55 about INCS. All our interviews were conducted by the same researcher, so no inter-observer variation  
56 occurred. We used a simple scoring system, making the scores less sensitive to errors.  
57  
58  
59  
60



1  
2  
3 This research only studied healthcare workers' knowledge of the administration technique. Studying  
4 whether the knowledge of a healthcare worker ultimately affects the correct spray technique, and,  
5 thus, the efficacy of INCS in patients, is recommended.  
6  
7

## 8 Conclusion

9 The majority of healthcare workers do not know how to administer an INCS correctly. This lack of  
10 knowledge may prevent them from being able to provide adequate instructions to their patients. Clear  
11 arrangements should be made regarding who provides these instructions and what these instructions  
12 include. Healthcare workers should continually update their knowledge regarding the correct spray  
13 technique. The established INCS protocols can be used to address this issue.  
14  
15  
16  
17  
18  
19  
20  
21  
22  
23  
24  
25  
26  
27  
28  
29  
30  
31  
32  
33  
34  
35  
36  
37  
38  
39  
40  
41  
42  
43  
44  
45  
46  
47  
48  
49  
50  
51  
52  
53  
54  
55  
56  
57  
58  
59  
60

For peer review only

### Acknowledgement

We thank the healthcare workers studied for their time and effort in this study.

### Funding

This research received no specific grant from any funding agency in the public, commercial or not-for-profit sectors.

### Author contributions

Marielle de Boer was involved in developing the study protocol, interviewed the participants, analysed the data and wrote the first draft. Corine Rollema was involved in developing the study protocol, analysing the data, and in the process of writing. Eric van Roon was involved in developing the study protocol and the process of writing. Tjalling de Vries had the original idea, was involved in developing the study protocol, analysing the data, and the process of writing. All authors read the final version and agree.

### Conflict of interests

All authors have completed the ICMJE uniform disclosure form at [www.icmje.org/coi\\_disclosure.pdf](http://www.icmje.org/coi_disclosure.pdf) and declare: no support from any organisation for the submitted work; no financial relationships with any organisations that might have an interest in the submitted work in the previous three years; no other relationships or activities that could appear to have influenced the submitted work.

### Data statement section

Technical appendix, statistical code, and dataset available from the authors

## References

1. Bousquet PJ, Leynaert B, Neukirch F, Sunyer J, Janson CM, Anto J, Jarvis D, Burney P. Geographical distribution of atopic rhinitis in the European Community Respiratory Health Survey I. *Allergy*. 2008 Oct;63 (10):1301-9.
2. Al Sayyad JJ, Fedorowicz Z, Alhashimi D, Jamal A. Topical nasal steroids for intermittent and persistent allergic rhinitis in children. *Cochrane Database of Systematic Reviews* 2007, Issue 1. Art. No.: CD003163. DOI: 10.1002/14651858.CD003163.pub4.
3. Nederlands Huisartsen Genootschap. Samenvattingskaart M48. Allergische en niet-allergische rhinitis. Herziening 2018. Available via: <https://www.nhg.org/standaarden/samenvatting/allergische-en-niet-allergische-rinitis>
4. Platts-Mills TAE. Allergen avoidance in the treatment of asthma and allergic rhinitis. Last updated: May 21, 2019. Available via: <https://www.uptodate.com>. Accessed at 12 May 2019.
5. deShazo RD, Kemp SF. Pharmacotherapy of allergic rhinitis. Last updated: Apr 08, 2018. Available via: <https://uptodate.com>. Accessed at 12 May 2019.
6. Weiner, J.M., Abramson M.J., Puy, R.M. Intranasal corticosteroids versus oral H1 receptor antagonists in allergic rhinitis: systematic review of randomized controlled trials. *BMJ*, 317 (1998), pp. 1624-162
7. Kaszuba SM, Baroody FM, deTineo M, Haney L, Blair C, Naclerio RM. Superiority of an intranasal corticosteroid compared with an oral antihistamine in the as-needed treatment of seasonal allergic rhinitis. *Arch Intern Med*. 2001;161(21):2581.
8. Ganesh V, Banigo A, McMurrin AEL, Shakeel M, Ram B. Does intranasal steroid spray technique affect side effects and compliance? Results of a patient survey. *J Laryngol Otol*. 2017 Nov;131(11):991-996.
9. Chong LY, Head K, Hopkins C, Philpott C, Schilder AG, Burton MJ. Intranasal steroids versus placebo or no intervention for chronic rhinosinusitis. *Cochrane Database Syst Rev*. 2016 Apr 26;4: CD011996.
10. Benninger MS, Ahmad N, Marple B. The safety of intranasal steroids. *Otolaryngol Head Neck Surg* 2003;129: 739-750.
11. Benninger MS, Hadley JA, Osguthorpe JD, Marple BF, Leopold DA, Derebery MJ, Hannley M. Techniques of intranasal steroid use. *Otolaryngol Head Neck Surg*. 2004 Jan;130(1):5-24.
12. Garlapati RR, Lee HP, Chong FH, Wang DY. Indicators for the correct usage of intranasal medications: a computational fluid dynamics study. *Laryngoscope*. 2009;119 ; 1975-1982.
13. Tay SY, Chao SS, Mark KTT, Wang DY. Comparison of the distribution of intranasal steroid spray using different application techniques. *Int Forum Allergy Rhinol*. 2016;6: 1204–1210
14. Rollema C, van Roon EN, de Vries TW. Inadequate quality of administration of intranasal corticosteroid sprays. *J Asthma Allergy*. 2019 Apr 3;12:91-94.

15. Rollema C, van Roon EN, Schilder AG, de Vries TW. Evaluation of instructions in patient information leaflets for the use of intranasal corticosteroid sprays: an observational study. *BMJ Open* 2019; 15: e026710.
16. Bosnic-Anticevich SZ, Sinha H, So S, Reddel HK. Metereddose inhaler technique: the effect of two educational interventions delivered in community pharmacy over time. *J Asthma* 2010;47:251–6
17. Timothy H. Self, Lori B. Arnold, Lauren M. Czosnowski, Joseph M. Swanson & Heather Swanson. Inadequate Skill of Healthcare Professionals in Using Asthma Inhalation Devices, *Journal of Asthma* 2007, 44:8, 593-598, DOI: 10.1080/02770900701554334
18. V. Plaza, J. Giner, G.J. Rodrigo, M.B. Dolovich, J. Sanchis. Errors in the use of inhalers by health care professionals: a systematic review *J Allergy Clin Immunol Pract*, 6 (2018), pp. 987-995
19. Adebayo AM, Ilesanmi OS. Knowledge of spacer device, peak flow meter and inhaler technique (MDIs) among health care providers: an evaluation of doctors and nurses. *Ghana Med J.* 2018 Mar;52(1):15-21. doi: 10.4314/gmj.v52i1.4
20. Smith KA, Rudmik L. Delivery of Topical Therapies. *Adv Otorhinolaryngol.* 2016;79:114-20.
21. Jang TY, Kim YH. Recent updates on the systemic and local safety of intranasal steroids. *Curr Drug Metab.* 2016;17(10):992-996
22. Milgrom H, Bender B. Adverse effects of medications for rhinitis. *Ann Allergy Asthma Immunol* 1997;78:439-44 ; 445-6
23. Hertzog, MA. Considerations in determining sample size for pilot studies. *Research in Nursing and Health* 31(2). Wiley 2008-4. 0160-68

**Table 1. Assessed steps per stage of the INCS protocol**

| <b>Preparation</b>          |                                                                                                                                                                            |
|-----------------------------|----------------------------------------------------------------------------------------------------------------------------------------------------------------------------|
| 1.                          | Discuss purpose and action of the medication.                                                                                                                              |
| 2.                          | Take off the dust cap.                                                                                                                                                     |
| 3.                          | <i>Firmly shake the bottle.*</i>                                                                                                                                           |
| 4.                          | Place forefinger and middle finger on both sides of the nozzle and place thumb underneath the bottle.                                                                      |
| 5.                          | Point the nozzle upwards and away from yourself.                                                                                                                           |
| 6.                          | Squirt a few sprays into the air until you see a cloud of mist.                                                                                                            |
| 7.                          | <i>Blow the nose or rinse the nose with saline if the nose is clogged.*</i>                                                                                                |
| <b>Administration</b>       |                                                                                                                                                                            |
| 8.                          | Place forefinger and middle finger on both sides of the nozzle and place thumb underneath the bottle.                                                                      |
| 9.                          | A. Keep the head upright and place the nozzle in the nose.<br>B. Use the right hand for spraying in the left nostril, and the left hand for spraying in the right nostril. |
| 10.                         | <i>Point the end of the nozzle slightly outwards, away from the centre ridge of the nose.*</i>                                                                             |
| 11.                         | Close the other nostril with your opposite hand.                                                                                                                           |
| 12.                         | <i>Squirt a spray of mist in the nose while breathing in.*</i>                                                                                                             |
| 13.                         | <i>Breathe out through the mouth.*</i>                                                                                                                                     |
| 14.                         | Repeat steps 8 through 13 for the other nostril.                                                                                                                           |
| 15.                         | If two sprays per nostril are prescribed, repeat steps 11 through 16 for both nostrils.                                                                                    |
| 16.                         | Replace the dust cap.                                                                                                                                                      |
| <b>Cleaning</b>             |                                                                                                                                                                            |
| 17.                         | Wipe the nozzle with a tissue or handkerchief after every use.                                                                                                             |
| 18.                         | Extensively wash the nozzle once a week:                                                                                                                                   |
| 19.                         | Take off the dust cap and nozzle.                                                                                                                                          |
| 20.                         | Rinse the dust cap and nozzle with warm water.                                                                                                                             |
| 21.                         | Shake off water.                                                                                                                                                           |
| 22.                         | Air dry the dust cap and nozzle.                                                                                                                                           |
| 23.                         | Replace the nozzle.                                                                                                                                                        |
| 24.                         | Firmly shake the bottle.                                                                                                                                                   |
| 25.                         | Squirt a few sprays into the air until you see a cloud of mist.                                                                                                            |
| 26.                         | Replace the dust cap.                                                                                                                                                      |
| <b>Points for attention</b> |                                                                                                                                                                            |
| 27.                         | If the nozzle does not spray properly, perform the cleaning steps. If this does not work, take the spray to the pharmacy. Never puncture the opening.                      |
| 28.                         | Check the expiry date on the package and the expiry date after opening.                                                                                                    |

\* *Essential steps*

**Table 2. Participant characteristics**

| Variable                                             | Overall (n = 75) |
|------------------------------------------------------|------------------|
| <b>Healthcare worker</b>                             |                  |
| Pharmacist assistant                                 | 20 (26)          |
| General practitioner                                 | 20 (26)          |
| Paediatrician                                        | 20 (26)          |
| ENT physician                                        | 15 (20)          |
| <b>Gender</b>                                        |                  |
| Male                                                 | 27 (36)          |
| Female                                               | 48 (64)          |
| <b>Age (mean), range (95% CI)</b>                    |                  |
|                                                      | 45.2 ±11         |
| <b>Years of professional practice</b>                |                  |
| 1 – 5 years                                          | 18 (24)          |
| 5 – 10 years                                         | 12 (16)          |
| 10 – 20 years                                        | 22 (29)          |
| > 20 years                                           | 23 (31)          |
| <b>Number of INCS prescriptions per week</b>         |                  |
| 0 times                                              | 20 (27)          |
| < 1 time                                             | 19 (25)          |
| 1 – 4 times                                          | 17 (23)          |
| 4 – 8 times                                          | 5 (7)            |
| > 8 times                                            | 14 (19)          |
| <b>Number of INCS instructions per week</b>          |                  |
| < 1 time                                             | 24 (32)          |
| 1 – 4 times                                          | 27 (36)          |
| 4 – 8 times                                          | 9 (12)           |
| > 8 times                                            | 15 (20)          |
| <b>Number of checks on INCS inhalations per week</b> |                  |
| < 1 time                                             | 62 (83)          |
| 1 – 4 times                                          | 15 (14)          |
| 4 – 8 times                                          | 2 (3)            |
| > 8 times                                            | 0 (0)            |
| <b>Use of information material</b>                   |                  |
| Yes                                                  | 19 (25)          |
| No                                                   | 56 (75)          |

All values are n (%).

**Table 3. Difference in total score checklist**

| Healthcare worker    | N  | Mean rank          | P-value between groups* |
|----------------------|----|--------------------|-------------------------|
| Pharmacist assistant | 20 | 54.58 <sup>a</sup> | 0.001                   |
| General practitioner | 20 | 30.98              |                         |
| Paediatrician        | 20 | 34.85              |                         |
| ENT physician        | 11 | 29.47              |                         |

Tested using Kruskal-Wallis test (post hoc Mann-Whitney U) \*P < 0.05. <sup>a</sup>Significant difference compared with general practitioners, paediatricians and ENT physicians.

For peer review only

**Table 4. Number of well-executed steps protocol**

| <b>Preparation</b>                                                                                                                                        | <b>n (%)</b> |
|-----------------------------------------------------------------------------------------------------------------------------------------------------------|--------------|
| 29. Discuss purpose and action of the medication.                                                                                                         | 75 (100)     |
| 30. Take off the dust cap.                                                                                                                                | 75 (100)     |
| 31. <i>Firmly shake the bottle.*</i>                                                                                                                      | 61 (81)      |
| 32. Place forefinger and middle finger on both sides of the nozzle and place thumb underneath the bottle.                                                 | 58 (77)      |
| 33. Point the nozzle upwards and away from yourself.                                                                                                      | 44 (59)      |
| 34. Squirt a few sprays into the air until you see a cloud of mist.                                                                                       | 44 (59)      |
| 35. <i>Blow the nose or rinse the nose with saline if the nose is clogged.*</i>                                                                           | 46 (61)      |
| <b>Administration</b>                                                                                                                                     | <b>n (%)</b> |
| 36. Place forefinger and middle finger on both sides of the nozzle and place thumb underneath the bottle.                                                 | 60 (80)      |
| 37. A. Keep the head upright and place the nozzle in the nose.                                                                                            | 49 (65)      |
| B. Use the right hand for spraying in the left nostril, and the left hand for spraying in the right nostril.                                              | 43 (57)      |
| 38. <i>Point the end of the nozzle slightly outwards, away from the centre ridge of the nose.*</i>                                                        | 66 (88)      |
| 39. Close the other nostril with your opposite hand.                                                                                                      | 33 (44)      |
| 40. <i>Squirt a spray of mist in the nose while breathing in.*</i>                                                                                        | 69 (92)      |
| 41. <i>Breathe out through the mouth.*</i>                                                                                                                | 57 (76)      |
| 42. Repeat steps 8 through 13 for the other nostril.                                                                                                      | 75 (100)     |
| 43. If two sprays per nostril are prescribed, repeat steps 11 through 16 for both nostrils.                                                               | 75 (100)     |
| 44. Replace the dust cap.                                                                                                                                 | 75 (100)     |
| <b>Cleaning</b>                                                                                                                                           | <b>n (%)</b> |
| 45. Wipe the nozzle with a tissue or handkerchief after every use.                                                                                        | 38 (51)      |
| 46. Extensively wash the nozzle once a week:                                                                                                              | 1 (1)        |
| 47. Take off the dust cap and nozzle.                                                                                                                     | 1 (1)        |
| 48. Rinse the dust cap and nozzle with warm water.                                                                                                        | 4 (6)        |
| 49. Shake off water.                                                                                                                                      | 1 (1)        |
| 50. Air dry the dust cap and nozzle.                                                                                                                      | 1 (1)        |
| 51. Replace the nozzle.                                                                                                                                   | 1 (1)        |
| 52. Firmly shake the bottle.                                                                                                                              | 1 (1)        |
| 53. Squirt a few sprays into the air until you see a cloud of mist.                                                                                       | 1 (1)        |
| 54. Replace the dust cap.                                                                                                                                 | 1 (1)        |
| <b>Points for attention</b>                                                                                                                               | <b>n (%)</b> |
| 55. If the nozzle does not spray properly, perform the cleaning steps. If this does not work, take the spray to the pharmacy. Never puncture the opening. | 13 (17)      |
| 56. Check the expiry date on the package and the expiry date after opening.                                                                               | 11 (15)      |

\* *Essential steps*



**Table 5. Scientifically and non-scientifically based steps in the corticosteroid nasal spray protocol**

| Scientifically based steps                                                                                                | Non-scientifically based steps                                    |
|---------------------------------------------------------------------------------------------------------------------------|-------------------------------------------------------------------|
| - Blow the nose or rinse the nose with saline if the nose is clogged. <sup>20</sup>                                       | - Firmly shake the bottle.                                        |
| - Keep the head upright. <sup>11,21</sup>                                                                                 | - Squirt a few sprays into the air until you see a cloud of mist. |
| - Use the right hand for spraying in the left nostril, and the left hand for spraying in the right nostril. <sup>13</sup> | - Close the other nostril with your opposite hand.                |
| - Point the end of the nozzle slightly outwards, away from the centre ridge of the nose.                                  | - Breathe out through the mouth.                                  |
| - Squirt a spray of mist in the nose while breathing in.                                                                  | - Wipe the nozzle with a tissue or handkerchief after every use.  |
|                                                                                                                           | - Extensively wash the nozzle once a week.                        |

Figure 1. Median score checklist per stage, per group of healthcare workers

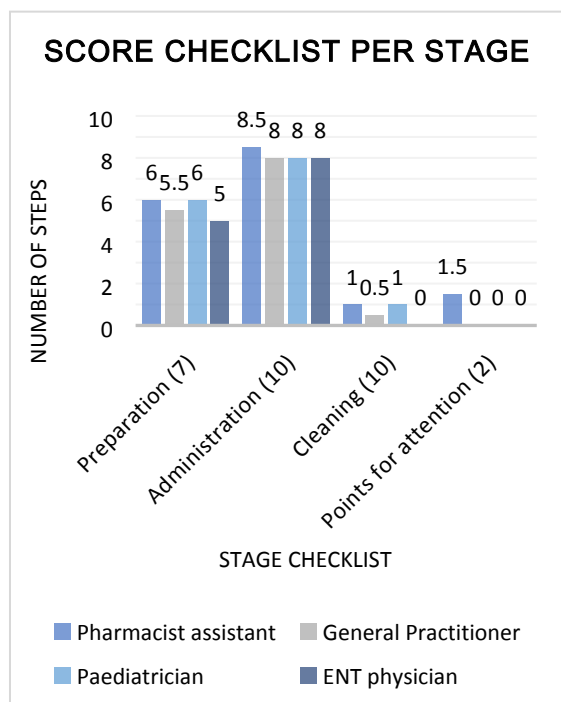

review only

## Reporting checklist for cross sectional study.

|                            |                     | Reporting Item                                                                                                                                                                                                                                                   | Page Number |
|----------------------------|---------------------|------------------------------------------------------------------------------------------------------------------------------------------------------------------------------------------------------------------------------------------------------------------|-------------|
| <b>Title and abstract</b>  |                     |                                                                                                                                                                                                                                                                  |             |
| Title                      | <a href="#">#1a</a> | Indicate the study's design with a commonly used term in the title or the abstract                                                                                                                                                                               | 1           |
| Abstract                   | <a href="#">#1b</a> | Provide in the abstract an informative and balanced summary of what was done and what was found                                                                                                                                                                  | 2           |
| <b>Introduction</b>        |                     |                                                                                                                                                                                                                                                                  |             |
| Background / rationale     | <a href="#">#2</a>  | Explain the scientific background and rationale for the investigation being reported                                                                                                                                                                             | 3           |
| Objectives                 | <a href="#">#3</a>  | State specific objectives, including any prespecified hypotheses                                                                                                                                                                                                 | 3           |
| <b>Methods</b>             |                     |                                                                                                                                                                                                                                                                  |             |
| Study design               | <a href="#">#4</a>  | Present key elements of study design early in the paper                                                                                                                                                                                                          | 3           |
| Setting                    | <a href="#">#5</a>  | Describe the setting, locations, and relevant dates, including periods of recruitment, exposure, follow-up, and data collection                                                                                                                                  | 3           |
| Eligibility criteria       | <a href="#">#6a</a> | Give the eligibility criteria, and the sources and methods of selection of participants.                                                                                                                                                                         | 3           |
|                            | <a href="#">#7</a>  | Clearly define all outcomes, exposures, predictors, potential confounders, and effect modifiers. Give diagnostic criteria, if applicable                                                                                                                         | 3           |
| Data sources / measurement | <a href="#">#8</a>  | For each variable of interest give sources of data and details of methods of assessment (measurement). Describe comparability of assessment methods if there is more than one group. Give information separately for exposed and unexposed groups if applicable. | 3           |
| Bias                       | <a href="#">#9</a>  | Describe any efforts to address potential sources of bias                                                                                                                                                                                                        | 3           |
| Study size                 | <a href="#">#10</a> | Explain how the study size was arrived at                                                                                                                                                                                                                        | 3           |

|    |                  |                      |                                                              |   |
|----|------------------|----------------------|--------------------------------------------------------------|---|
| 1  |                  |                      |                                                              |   |
| 2  |                  |                      |                                                              |   |
| 3  | Quantitative     | <a href="#">#11</a>  | Explain how quantitative variables were handled in the       | 3 |
| 4  | variables        |                      | analyses. If applicable, describe which groupings were       |   |
| 5  |                  |                      | chosen, and why                                              |   |
| 6  |                  |                      |                                                              |   |
| 7  |                  |                      |                                                              |   |
| 8  | Statistical      | <a href="#">#12a</a> | Describe all statistical methods, including those used to    | 3 |
| 9  | methods          |                      | control for confounding                                      |   |
| 10 |                  |                      |                                                              |   |
| 11 | Statistical      | <a href="#">#12b</a> | Describe any methods used to examine subgroups and           | 3 |
| 12 | methods          |                      | interactions                                                 |   |
| 13 |                  |                      |                                                              |   |
| 14 | Statistical      | <a href="#">#12c</a> | Explain how missing data were addressed                      | 3 |
| 15 | methods          |                      |                                                              |   |
| 16 |                  |                      |                                                              |   |
| 17 |                  |                      |                                                              |   |
| 18 | Statistical      | <a href="#">#12d</a> | If applicable, describe analytical methods taking account of | 3 |
| 19 | methods          |                      | sampling strategy                                            |   |
| 20 |                  |                      |                                                              |   |
| 21 | Statistical      | <a href="#">#12e</a> | Describe any sensitivity analyses                            | 3 |
| 22 | methods          |                      |                                                              |   |
| 23 |                  |                      |                                                              |   |
| 24 |                  |                      |                                                              |   |
| 25 | <b>Results</b>   |                      |                                                              |   |
| 26 |                  |                      |                                                              |   |
| 27 | Participants     | <a href="#">#13a</a> | Report numbers of individuals at each stage of study—eg      | 4 |
| 28 |                  |                      | numbers potentially eligible, examined for eligibility,      |   |
| 29 |                  |                      | confirmed eligible, included in the study, completing        |   |
| 30 |                  |                      | follow-up, and analysed. Give information separately for     |   |
| 31 |                  |                      | exposed and unexposed groups if applicable.                  |   |
| 32 |                  |                      |                                                              |   |
| 33 |                  |                      |                                                              |   |
| 34 | Participants     | <a href="#">#13b</a> | Give reasons for non-participation at each stage             | 4 |
| 35 |                  |                      |                                                              |   |
| 36 | Participants     | <a href="#">#13c</a> | Consider use of a flow diagram                               |   |
| 37 |                  |                      |                                                              |   |
| 38 | Descriptive data | <a href="#">#14a</a> | Give characteristics of study participants (eg demographic,  | 4 |
| 39 |                  |                      | clinical, social) and information on exposures and potential |   |
| 40 |                  |                      | confounders. Give information separately for exposed and     |   |
| 41 |                  |                      | unexposed groups if applicable.                              |   |
| 42 |                  |                      |                                                              |   |
| 43 |                  |                      |                                                              |   |
| 44 | Descriptive data | <a href="#">#14b</a> | Indicate number of participants with missing data for each   | 4 |
| 45 |                  |                      | variable of interest                                         |   |
| 46 |                  |                      |                                                              |   |
| 47 |                  |                      |                                                              |   |
| 48 | Outcome data     | <a href="#">#15</a>  | Report numbers of outcome events or summary measures.        | 4 |
| 49 |                  |                      | Give information separately for exposed and unexposed        |   |
| 50 |                  |                      | groups if applicable.                                        |   |
| 51 |                  |                      |                                                              |   |
| 52 | Main results     | <a href="#">#16a</a> | Give unadjusted estimates and, if applicable, confounder-    | 4 |
| 53 |                  |                      | adjusted estimates and their precision (eg, 95% confidence   |   |
| 54 |                  |                      | interval). Make clear which confounders were adjusted for    |   |
| 55 |                  |                      | and why they were included                                   |   |
| 56 |                  |                      |                                                              |   |
| 57 |                  |                      |                                                              |   |
| 58 |                  |                      |                                                              |   |
| 59 |                  |                      |                                                              |   |
| 60 |                  |                      |                                                              |   |

|    |                    |                      |                                                                                                                                                                  |   |
|----|--------------------|----------------------|------------------------------------------------------------------------------------------------------------------------------------------------------------------|---|
| 1  |                    |                      |                                                                                                                                                                  |   |
| 2  |                    |                      |                                                                                                                                                                  |   |
| 3  | Main results       | <a href="#">#16b</a> | Report category boundaries when continuous variables were categorized                                                                                            | 4 |
| 4  |                    |                      |                                                                                                                                                                  |   |
| 5  |                    |                      |                                                                                                                                                                  |   |
| 6  | Main results       | <a href="#">#16c</a> | If relevant, consider translating estimates of relative risk into absolute risk for a meaningful time period                                                     | 4 |
| 7  |                    |                      |                                                                                                                                                                  |   |
| 8  |                    |                      |                                                                                                                                                                  |   |
| 9  |                    |                      |                                                                                                                                                                  |   |
| 10 | Other analyses     | <a href="#">#17</a>  | Report other analyses done—e.g., analyses of subgroups and interactions, and sensitivity analyses                                                                | 4 |
| 11 |                    |                      |                                                                                                                                                                  |   |
| 12 |                    |                      |                                                                                                                                                                  |   |
| 13 | <b>Discussion</b>  |                      |                                                                                                                                                                  |   |
| 14 |                    |                      |                                                                                                                                                                  |   |
| 15 | Key results        | <a href="#">#18</a>  | Summarise key results with reference to study objectives                                                                                                         | 4 |
| 16 |                    |                      |                                                                                                                                                                  |   |
| 17 | Limitations        | <a href="#">#19</a>  | Discuss limitations of the study, taking into account sources of potential bias or imprecision. Discuss both direction and magnitude of any potential bias.      | 5 |
| 18 |                    |                      |                                                                                                                                                                  |   |
| 19 |                    |                      |                                                                                                                                                                  |   |
| 20 |                    |                      |                                                                                                                                                                  |   |
| 21 |                    |                      |                                                                                                                                                                  |   |
| 22 | Interpretation     | <a href="#">#20</a>  | Give a cautious overall interpretation considering objectives, limitations, multiplicity of analyses, results from similar studies, and other relevant evidence. | 5 |
| 23 |                    |                      |                                                                                                                                                                  |   |
| 24 |                    |                      |                                                                                                                                                                  |   |
| 25 |                    |                      |                                                                                                                                                                  |   |
| 26 |                    |                      |                                                                                                                                                                  |   |
| 27 | Generalisability   | <a href="#">#21</a>  | Discuss the generalisability (external validity) of the study results                                                                                            | 5 |
| 28 |                    |                      |                                                                                                                                                                  |   |
| 29 |                    |                      |                                                                                                                                                                  |   |
| 30 | <b>Other</b>       |                      |                                                                                                                                                                  |   |
| 31 | <b>Information</b> |                      |                                                                                                                                                                  |   |
| 32 |                    |                      |                                                                                                                                                                  |   |
| 33 |                    |                      |                                                                                                                                                                  |   |
| 34 | Funding            | <a href="#">#22</a>  | Give the source of funding and the role of the funders for the present study and, if applicable, for the original study on which the present article is based    | 7 |
| 35 |                    |                      |                                                                                                                                                                  |   |
| 36 |                    |                      |                                                                                                                                                                  |   |
| 37 |                    |                      |                                                                                                                                                                  |   |

None The STROBE checklist is distributed under the terms of the Creative Commons Attribution License CC-BY. This checklist can be completed online using <https://www.goodreports.org/>, a tool made by the [EQUATOR Network](#) in collaboration with [Penelope.ai](#)

# BMJ Open

## Observational study of administering intranasal steroid sprays by healthcare workers

|                                 |                                                                                                                                                                                                                                                                                            |
|---------------------------------|--------------------------------------------------------------------------------------------------------------------------------------------------------------------------------------------------------------------------------------------------------------------------------------------|
| Journal:                        | <i>BMJ Open</i>                                                                                                                                                                                                                                                                            |
| Manuscript ID                   | bmjopen-2020-037660.R1                                                                                                                                                                                                                                                                     |
| Article Type:                   | Original research                                                                                                                                                                                                                                                                          |
| Date Submitted by the Author:   | 22-Apr-2020                                                                                                                                                                                                                                                                                |
| Complete List of Authors:       | de Boer, Marielle; Medical Center Leeuwarden, Paediatrics<br>Rollema, Corine; Medical Center Leeuwarden, Clinical Pharmacy and Pharmacology<br>van Roon, Eric; University of Groningen, Pharmacotherapy and Pharmaceutical Care<br>Vries, Tjalling; Medical Center Leeuwarden, Paediatrics |
| <b>Primary Subject Heading</b>: | Ear, nose and throat/otolaryngology                                                                                                                                                                                                                                                        |
| Secondary Subject Heading:      | Pharmacology and therapeutics                                                                                                                                                                                                                                                              |
| Keywords:                       | Allergy < THORACIC MEDICINE, THERAPEUTICS, OTOLARYNGOLOGY                                                                                                                                                                                                                                  |
|                                 |                                                                                                                                                                                                                                                                                            |

SCHOLARONE™  
Manuscripts



I, the Submitting Author has the right to grant and does grant on behalf of all authors of the Work (as defined in the below author licence), an exclusive licence and/or a non-exclusive licence for contributions from authors who are: i) UK Crown employees; ii) where BMJ has agreed a CC-BY licence shall apply, and/or iii) in accordance with the terms applicable for US Federal Government officers or employees acting as part of their official duties; on a worldwide, perpetual, irrevocable, royalty-free basis to BMJ Publishing Group Ltd ("BMJ") its licensees and where the relevant Journal is co-owned by BMJ to the co-owners of the Journal, to publish the Work in this journal and any other BMJ products and to exploit all rights, as set out in our [licence](#).

The Submitting Author accepts and understands that any supply made under these terms is made by BMJ to the Submitting Author unless you are acting as an employee on behalf of your employer or a postgraduate student of an affiliated institution which is paying any applicable article publishing charge ("APC") for Open Access articles. Where the Submitting Author wishes to make the Work available on an Open Access basis (and intends to pay the relevant APC), the terms of reuse of such Open Access shall be governed by a Creative Commons licence – details of these licences and which [Creative Commons](#) licence will apply to this Work are set out in our licence referred to above.

Other than as permitted in any relevant BMJ Author's Self Archiving Policies, I confirm this Work has not been accepted for publication elsewhere, is not being considered for publication elsewhere and does not duplicate material already published. I confirm all authors consent to publication of this Work and authorise the granting of this licence.

1 Title: Observational study of administering intranasal steroid sprays by healthcare workers

2  
3  
4  
5  
6  
7 1 Mariëlle de Boer,<sup>1</sup> Corine Rollema,<sup>2</sup> Eric N van Roon,<sup>3</sup> Tjalling W de Vries<sup>4</sup>

8  
9  
10 1 Mariëlle de Boer, medical student, Faculty of medical sciences, University of Groningen,  
11 Groningen, the Netherlands; E-mail: marielle.de.boer@hotmail.com

12  
13  
14 2 Corine Rollema, MSc, pharmacist. Department of Clinical Pharmacy and Pharmacology, Medical  
15 Centre Leeuwarden, Leeuwarden, the Netherlands; E-mail: corine.rollema@znb.nl

16  
17  
18 3 Prof.dr. Eric van Roon, MSc, Ph.D., Department of Clinical Pharmacy and Pharmacology, Medical  
19 Centre Leeuwarden, Leeuwarden, the Netherlands; Groningen Research Institute of Pharmacy,  
20 Department Pharmacotherapy, Epidemiology and Economy, University of Groningen, Groningen, the  
21 Netherlands. E-mail: e.n.van.roon@znb.nl

22  
23  
24 4 Tjalling de Vries, M.D., Ph.D., paediatrician. Department of Paediatrics, Medical Centre  
25 Leeuwarden, Leeuwarden, the Netherlands. E-mail: tjalling.de.vries@znb.nl

26  
27  
28 21 Corresponding author: Tjalling de Vries, Department of Paediatrics, Medical Centre Leeuwarden, the  
29 Netherlands. Tel: ++ 31 58 286 3385; fax ++ 31 58 286 3390, E-mail: tjalling.de.vries@znb.nl

30  
31  
32  
33  
34  
35  
36  
37 27 Keywords: Intranasal corticosteroid sprays, allergic rhinitis, administration techniques, quality of  
38 28 administration, healthcare workers

39  
40  
41  
42 30 Word counts:

43  
44 31 Total word count: 4402

45  
46 32 Word count text: 2563  
47  
48  
49  
50  
51  
52  
53  
54  
55  
56  
57  
58  
59  
60



1  
2  
3 1 Abstract  
4 2

5 3 Objectives: Patients with allergic rhinitis receive their information about administering intranasal  
6 4 corticosteroid sprays (INCS) from healthcare workers. Since the majority of patients do not  
7 5 administer these sprays correctly, we investigated whether healthcare workers know how to  
8 6 administer INCS.

9 7 Settings: we studied participants at their working place: pharmacy, outpatient clinic, or general  
10 8 practitioner centre for emergencies

11 9 Participants: pharmacist assistants, general practitioners, paediatricians, and ear nose throat doctors.

12 10 Design: observational study

13 11 Primary outcome: number of steps of administration of INCS, based on the established INCS protocol

14 12 Secondary outcome: number of the five steps that are labelled essential to obtain optimal distribution  
15 13 of the medication. All the participants demonstrated the administration technique with a spray device  
16 14 filled with water.

17 15 Results: Among the 75 participants, none performed all the steps correctly. The median of correctly  
18 16 performed steps in the protocol was 14 out of 29. A significantly better result was found among the  
19 17 pharmacist assistants. The essential steps were performed by 27 out of the 75 participants (36%).

20 18 Conclusion: The majority of healthcare workers do not know how to administer INCS correctly.

21 19 Patients could, therefore, receive incorrect and non-uniform instructions. The education of healthcare  
22 20 workers on how to administer INCS correctly may be an option for improvement

23 21  
24 22  
25 23  
26 24 Strengths and limitations of this study  
27 25  
28 26

29 27 This is the first study to observe healthcare workers administering INCS.  
30 28

31 29 We conducted this study in a small research group, consisting of 75 healthcare workers.  
32 30

33 31 The administration technique was scored in a simple and robust way by the same investigator.  
34 32

35 33 We used a protocol for correct administration based on literature and patient information leaflets,  
36 34 however, not all steps are based on firm scientific evidence.  
37 35  
38 36  
39 37  
40 38  
41 39  
42  
43  
44  
45  
46  
47  
48  
49  
50  
51  
52  
53  
54  
55  
56  
57  
58  
59  
60

## 1 Introduction

2 Allergic rhinitis is a common chronic disease, with a prevalence ranging from 10 to 40% worldwide.<sup>1</sup>  
3 The disease mostly affects people between 5 and 45 years old, with a peak incidence between 19 and  
4 24 years old.<sup>2</sup> In addition to allergen avoidance, the management of allergic rhinitis consists of either  
5 antihistamines, intranasal corticosteroids or a combination of both.<sup>3-4</sup> When persistent symptoms  
6 occur, intranasal corticosteroid sprays (INCS) are the treatment of choice.<sup>5-6</sup>  
7 Studies suggest that the administration technique for INCS is associated with efficacy, adverse events  
8 and compliance.<sup>4,7</sup> For example, it was found that the optimal administration technique of INCS is  
9 spraying with a contralateral spray technique, pointing the nozzle away from the septum, because  
10 spraying towards the septum causes more nosebleeds than the recommended approach.<sup>7-9</sup>  
11 Furthermore, the head should be kept in a neutral position, and it is important to breathe in calmly  
12 while spraying. This technique provides the best distribution of the medication.<sup>10-12</sup>  
13 In a recent study, we observed the method of administration among patients and found that most  
14 (94%) did not take their INCS as described in the patient information leaflets (PILs).<sup>13</sup> Moreover, the  
15 available PILs are currently incomplete and non-uniform.<sup>14</sup> Since patients do not only learn from  
16 PILs, but can also be instructed by healthcare workers, we wanted to know whether such they could  
17 demonstrate the administration of INCS correctly. As far as we know, this factor has never previously  
18 been studied. Therefore, we investigated the knowledge of healthcare workers regarding  
19 administering INCS.

## 21 Material and methods

### 22 Participants and setting

23 We performed an observational study in the northern part of the Netherlands. The healthcare workers  
24 observed included pharmacist assistants, general practitioners, paediatricians, and ENT physicians.  
25 Healthcare workers were excluded if they had been practising their profession for less than a year.  
26 Paediatricians and ENT physicians from eight hospitals were approached via email. We approached  
27 pharmacist assistants from six pharmacies. General practitioners were approached while working at  
28 the general practitioner centre for emergencies based at the Medical Centre Leeuwarden.

### 29 Study design

30 When eligible healthcare workers agreed to participate, a face-to-face interview was conducted. All  
31 the participants were aware of the aim of the study. To prevent inter-observer variation, all interviews  
32 and observations were performed by the same researcher (MdB).  
33 During the interviews, the healthcare workers answered a questionnaire containing questions about  
34 their experiences prescribing INCS and about how they provide patients with information. Then, the  
35 healthcare workers were asked to demonstrate the administration technique with a spray device filled  
36 with water. The stages assessed were preparation, administration and cleaning of the INCS [Table 1].  
37 Assessment of the administration technique was based on the established Dutch INCS protocol.  
38 During administration, this protocol was used as a scoring sheet, consisting of 29 steps. One point was  
39 given each time the participant performed a step correctly. In the INCS protocol, five steps are  
40 labelled as essential.<sup>14</sup> These steps are considered as essential because they most influence the  
41 distribution and efficacy of the medication. The essential steps include shaking the bottle, blowing or  
42 rinsing the nose, directing the nebuliser away from the nasal septum, breathing in while  
43 simultaneously squirting a spray of mist, and exhaling through the mouth.

### 45 Statistical analysis

46 In the statistical analysis, descriptive statistics were used to answer the question of whether healthcare  
47 workers know how to administer INCS. For the comparison of outcomes between populations, a

1  
2  
3 1 Kruskal Wallis test was used. Post hoc analysis was performed using a Mann Whitney U test. The  
4 2 regional medical ethics committee approved the study protocol. All the participants provided written  
5 3 consent.  
6 4

#### 8 5 Patient and Public Involvement

9 6 Patients or the public WERE NOT involved in the design, or conduct, or reporting, or dissemination  
10 7 plans of our research.  
11 8

## 13 9 Results

14 10 In the period between June 11<sup>th</sup> and December 18<sup>th</sup>, 2019, ten ENT-departments, seven paediatrician  
15 11 departments and eight pharmacies were asked to participate in this study. General practitioners were  
16 12 approached at the GP's emergency centre and asked to participate on the spot. 75 healthcare workers  
17 13 participated in our study [Table 2], none of whom performed all the steps correctly. The median of  
18 14 correctly performed steps in the protocol was 14 out of 29, with a range between 9 and 24 and an  
19 15 interquartile range of 3.5. For preparing the spray, the median was six out of seven steps. The median  
20 16 for administering the spray was eight out of 10 steps, and the median for cleaning the spray was one  
21 17 out of 10 steps. The points for attention, which are taking the spray to the pharmacy when it does not  
22 18 work and checking the expiry date, were not performed by most participants [Figure 1]. When  
23 19 analysing the differences in total score between the healthcare workers, a significantly higher result  
24 20 was found among pharmacist assistants compared with the other groups [Table 3].

25 21 Twenty-seven out of 75 participants (36%) performed all the essential steps. Of the essential steps,  
26 22 nose-blowing was performed least frequently, being carried out 46 out of 75 times (61%). Inhaling  
27 23 while squirting a spray of mist into the open nostril was performed most often: 69 out of 75 times  
28 24 (92%). Shaking the bottle was done 61 times (81%). The nozzle was directed outwards 66 times  
29 25 (88%). Exhaling through the mouth was done by 57 participants (76%) [Table 4].

30 26 Sixteen participants (21%) performed all the preparation steps. The least performed steps during  
31 27 preparation were activating the nozzle by spraying in the air (59%) and blowing or rinsing the nose  
32 28 (61%). Two participants (3%) performed all the administration steps. Squirting the spray while  
33 29 breathing in (92%) and pointing the nozzle outwards (88%) were performed by most participants. The  
34 30 most frequent errors in administration were, in order, keeping the other nostril closed, spraying  
35 31 crosswise and keeping the head upright. These steps were performed 33 times (44%), 43 times (47%)  
36 32 and 49 times (65%), respectively. One participant (1%) performed all the cleaning steps, including  
37 33 cleaning the nozzle with a tissue and extensively cleaning the nozzle with water once a week and  
38 34 allowing it to air dry. Approximately half the participants (38; 51%) cleaned the spray with a tissue  
39 35 after every use [Table 4].  
40 36

## 47 37 Discussion

48 38 In this study we found that most healthcare workers involved in the care for patients with allergic  
49 39 rhinitis did not know and could not demonstrate how to administer INCS correctly. None of the  
50 40 healthcare workers performed all the steps of the checklist correctly. The median of the 75  
51 41 participants was 14 out of 29 well-executed steps. The five essential steps were correctly performed  
52 42 by 27 out of 75 participants (36%). We found that the pharmacist assistants administered the INCS  
53 43 significantly better than the other healthcare workers, suggesting that pharmacist assistants are most  
54 44 suitable for providing information about INCS.

55 45 To the best of our knowledge, the role of healthcare workers in informing patients about the correct  
56 46 administration of INCS has never previously been studied. One recent study found that face-to-face  
57 47 instruction, consisting of both verbal information and a physical demonstration, was most effective in

1 teaching the correct technique for asthma medication.<sup>15</sup> This finding may apply regarding the correct  
2 usage of INCS as well, meaning that it is important that healthcare workers have sufficient  
3 knowledge. Knowledge about inhaler technique for asthma and chronic obstructive pulmonary disease  
4 (COPD) has been researched using healthcare workers. These studies reveal similar results to ours;  
5 that is, inadequate knowledge regarding the use of inhalers.<sup>16-17</sup> A recent study found only 12% of  
6 healthcare workers knew at least three essential steps of the correct metered-dose inhaler technique,  
7 and none of the participants performed all the steps correctly.<sup>18</sup>

8 For the checklist, we used a standardised protocol recently published in Dutch healthcare. Although  
9 this protocol is based on existing literature, a few instruction steps are only marginally substantiated  
10 by research data, and we needed to make a few assumptions about the best spray technique [Table 5].  
11 First, an essential step while preparing for administration is blowing or rinsing the nose. This step is  
12 recommended in the literature, although no significantly better distribution of the active substance  
13 was found.<sup>19</sup> Approximately 60% of the participants performed this step. Next, it was found that an  
14 upright position of the head while spraying proved most effective.<sup>10,20</sup> Bending the head backwards  
15 can result in the active substance leaking into the pharynx, causing irritation and possibly more  
16 systemic uptake. When bending the head forward, the active substance could easily run out again.  
17 However, 45% of the ENT doctors and 10 to 20% of the paediatricians, general practitioners and  
18 pharmacist assistants bent their heads forward while breathing in the spray. Their reasoning was that  
19 the nasal cavity runs backwards, causing the spray to be sprayed towards the nasal cavity when the  
20 head is bent forward. There is a study that confirms this theory.<sup>12</sup> However, when administering the  
21 nasal spray, the nozzle should be directed away from the nasal septum to prevent nose bleeding and  
22 septum perforation. Furthermore, the lateral nasal wall has more cilia than the medial wall, so the  
23 distribution of the active substance is better.<sup>7,9</sup> We found that this essential step was performed  
24 correctly by 88% of the participants. It is also advised to use the contralateral hand while spraying,  
25 because this causes less mechanical irritation, and, thus, fewer side effects and better compliance.<sup>7</sup>  
26 Approximately half the participants (57%) performed this step. However, not all these participants  
27 recommended this step to their patients, because it is relatively complicated to perform. Another  
28 essential step is to breathe in slowly during administration, because the airflow ensures a better  
29 contribution of the active substance. A continuous, slow flow has the best effect. Breathing hard or  
30 sniffing can lead to increased turbulence in the nose, which can cause the active substance to finish in  
31 the pharynx.<sup>11,21</sup> This was the best performed essential step: 92% of participants performed this  
32 correctly. Only one participant stated that the nasal spray should be completely cleaned with water  
33 once a week. Since these nasal sprays are used chronically and daily in many cases, good hygiene is  
34 important. However, there is no uniform instruction for cleaning the nasal spray in the package  
35 leaflets. This lack is a possible explanation why the healthcare workers did not mention this aspect.  
36 Considering that there is little substantiated research about the correct administration technique, and  
37 since the published INCS protocol is not widely known, healthcare providers apparently provide  
38 instructions according to their own insights. Further research is necessary to substantiate the most  
39 effective administration technique for nasal sprays. Currently, it is important to implement the present  
40 available instructions to achieve clarity in the instructions for the administration of nasal sprays.

#### 41 Strengths and limitations

42 This study has a couple of limitations. First, we did not know what outcomes to expect, so we chose  
43 to conduct this research with a relatively small research group in a particular region.<sup>22</sup> Further  
44 research must determine to what extent our results apply to other regions and countries. Second, we  
45 could only include 15 ENT doctors despite many attempts and visits to their offices. Reasons given  
46 were that they were too busy or not interested in participating. Nevertheless, we do not think that the  
47 inclusion of five more ENT doctors would affect the outcome significantly. Thirdly, it is possible that  
48

1 healthcare workers only agreed to participate in this study when they felt an affinity with the topic.  
2  
3  
4 1 Greater interest might influence the knowledge of a correct administration technique. Healthcare  
5 2 workers with less affinity would possibly score lower. Given the disappointing results of the studied  
6 3 population, this only highlights the fact that the healthcare workers' knowledge about the correct  
7 4 administration technique must improve. Lastly, we studied the knowledge of healthcare workers, not  
8 5 the actual instruction patients receive from them.  
9 6

10 7 The strengths of this study are as follows: since various hospitals, general practices and pharmacies  
11 8 were included, the results are a good reflection of the population that both prescribes and informs  
12 9 about INCS. All our interviews were conducted by the same researcher, so no inter-observer variation  
13 10 occurred. We used a simple scoring system, making the scores less sensitive to errors.

14 11 This research only studied healthcare workers' knowledge of the administration technique. Studying  
15 12 whether the knowledge of a healthcare worker ultimately affects the correct spray technique, and,  
16 13 thus, the efficacy of INCS in patients, is recommended.  
17 14

## 15 Conclusion

16 16 The majority of healthcare workers do not know how to administer an INCS correctly. This lack of  
17 17 knowledge may prevent them from being able to provide adequate instructions to their patients. Clear  
18 18 arrangements should be made regarding who provides these instructions and what these instructions  
19 19 include. Healthcare workers should continually update their knowledge regarding the correct spray  
20 20 technique. The established INCS protocols can be used to address this issue.  
21 21

## Acknowledgement

We thank the healthcare workers studied for their time and effort in this study.

## Funding

This research received no specific grant from any funding agency in the public, commercial or not-for-profit sectors.

## Author contributions

Marielle de Boer was involved in developing the study protocol, interviewed the participants, analysed the data and wrote the first draft. Corine Rollema was involved in developing the study protocol, analysing the data, and in the process of writing. Eric van Roon was involved in developing the study protocol and the process of writing. Tjalling de Vries had the original idea, was involved in developing the study protocol, analysing the data, and the process of writing. All authors read the final version and agree.

## Conflict of interests

All authors have completed the ICMJE uniform disclosure form at [www.icmje.org/coi\\_disclosure.pdf](http://www.icmje.org/coi_disclosure.pdf) and declare: no support from any organisation for the submitted work; no financial relationships with any organisations that might have an interest in the submitted work in the previous three years; no other relationships or activities that could appear to have influenced the submitted work.

## Data statement section

Technical appendix, statistical code, and dataset available from the authors

Figure 1 legend: Median score checklist per stage, per group of healthcare workers

## References

1. Bousquet PJ, Leynaert B, Neukirch F, Sunyer J, Janson CM, Anto J, Jarvis D, Burney P. Geographical distribution of atopic rhinitis in the European Community Respiratory Health Survey I. *Allergy*. 2008 Oct;63 (10):1301-9.
2. Nederlands Huisartsen Genootschap. Samenvattingskaart M48. Allergische en niet-allergische rhinitis. *Herziening 2018*. Available via: <https://www.nhg.org/standaarden/samenvatting/allergische-en-niet-allergische-rinitis>
3. Platts-Mills TAE. Allergen avoidance in the treatment of asthma and allergic rhinitis. Last updated: May 21, 2019. Available via: <https://www.uptodate.com>. Accessed at 12 May 2019.
4. deShazo RD, Kemp SF. Pharmacotherapy of allergic rhinitis. Last updated: Apr 08, 2018. Available via: <https://uptodate.com>. Accessed at 12 May 2019.
5. European Position Paper on Rhinosinusitis and Nasal Polyps 2020. Fokkens WJ, et al. *Rhinology*. 2020 Feb 20;58(Suppl S29):1-464

- 1  
2  
3 1 6. Karatzanis A, et al. Contemporary Use of Corticosteroids in Rhinology. *Curr Allergy Asthma Rep.* 2017 Feb;17(2):11
- 4 2
- 5 3
- 6 4 7. Ganesh V, Banigo A, McMurrin AEL, Shakeel M, Ram B. Does intranasal steroid spray
- 7 5 technique affect side effects and compliance? Results of a patient survey. *J Laryngol Otol.* 2017
- 8 6 Nov;131(11):991-996.
- 9 7
- 10 8 8. Chong LY, Head K, Hopkins C, Philpott C, Schilder AG, Burton MJ. Intranasal steroids versus
- 11 9 placebo or no intervention for chronic rhinosinusitis. *Cochrane Database Syst Rev.* 2016 Apr
- 12 10 26;4: CD011996.
- 13 11
- 14 12 9. Benninger MS, Ahmad N, Marple B. The safety of intranasal steroids. *Otolaryngol Head Neck*
- 15 13 *Surg* 2003;129: 739-750.
- 16 14
- 17 15 10. Benninger MS, Hadley JA, Osguthorpe JD, Marple BF, Leopold DA, Derebery MJ, Hannley M.
- 18 16 Techniques of intranasal steroid use. *Otolaryngol Head Neck Surg.* 2004 Jan;130(1):5-24.
- 19 17
- 20 18 11. Garlapati RR, Lee HP, Chong FH, Wang DY. Indicators for the correct usage of intranasal
- 21 19 medications: a computational fluid dynamics study. *Laryngoscope.* 2009;119 ; 1975-1982.
- 22 20
- 23 21 12. Tay SY, Chao SS, Mark KTT, Wang DY. Comparison of the distribution of intranasal steroid
- 24 22 spray using different application techniques. *Int Forum Allergy Rhinol.* 2016;6: 1204–1210
- 25 23
- 26 24 13. Rollema C, van Roon EN, de Vries TW. Inadequate quality of administration of intranasal
- 27 25 corticosteroid sprays. *J Asthma Allergy.* 2019 Apr 3;12:91-94.
- 28 26
- 29 27 14. Rollema C, van Roon EN, Schilder AG, de Vries TW. Evaluation of instructions in patient
- 30 28 information leaflets for the use of intranasal corticosteroid sprays: an observational study. *BMJ*
- 31 29 *Open* 2019; 15: e026710.
- 32 30 15. Bosnic-Anticevich SZ, Sinha H, So S, Reddel HK. Metereddose inhaler technique: the effect of
- 33 31 two educational interventions delivered in community pharmacy over time. *J Asthma*
- 34 32 2010;47:251–6
- 35 33
- 36 34 16. Timothy H. Self, Lori B. Arnold, Lauren M. Czosnowski, Joseph M. Swanson & Heather
- 37 35 Swanson. Inadequate Skill of Healthcare Professionals in Using Asthma Inhalation Devices,
- 38 36 *Journal of Asthma* 2007, 44:8, 593-598, DOI: 10.1080/02770900701554334
- 39 37
- 40 38 17. V. Plaza, J. Giner, G.J. Rodrigo, M.B. Dolovich, J. SanchisErrors in the use of inhalers by health
- 41 39 care professionals: a systematic review *J Allergy Clin Immunol Pract*, 6 (2018), pp. 987-995
- 42 40
- 43 41 18. Adebayo AM, Ilesanmi OS. Knowledge of spacer device, peak flow meter
- 44 42 and inhaler technique (MDIs) among health care providers: an evaluation of doctors and nurses.
- 45 43 *Ghana Med J.* 2018 Mar;52(1):15-21. doi: 10.4314/gmj.v52i1.4
- 46 44
- 47 45 19. Smith KA, Rudmik L. Delivery of Topical Therapies. *Adv Otorhinolaryngol.* 2016;79:114-20.
- 48 46
- 49 47 20. Jang TY, Kim YH. Recent updates on the systemic and local safety of intranasal steroids. *Curr*
- 50 48 *Drug Metab.* 2016;17(10):992-996
- 51 49
- 52 50 21. Milgrom H, Bender B. Adverse effects of medications for rhinitis. *Ann Allergy Asthma Immunol*
- 53 51 1997;78:439-44 ; 445-6
- 54 52
- 55 53 22. Hertzog, MA. Considerations in determining sample size for pilot studies. *Research in Nursing*
- 56 54 *and Health* 31(2). Wiley 2008-4. 0160-68
- 57 55
- 58 56
- 59 57
- 60 58

1  
2  
3  
4  
5  
6  
7  
8  
9  
10  
11  
12  
13  
14  
15  
16  
17  
18  
19  
20  
21  
22  
23  
24  
25  
26  
27  
28  
29  
30  
31  
32  
33  
34  
35  
36  
37  
38  
39  
40  
41  
42  
43  
44  
45  
46  
47  
48  
49  
50  
51  
52  
53  
54  
55  
56  
57  
58  
59  
60

For peer review only



**Table 1. Assessed steps per stage of the INCS protocol**

| <b>Preparation</b>          |                                                                                                                                                                            |
|-----------------------------|----------------------------------------------------------------------------------------------------------------------------------------------------------------------------|
| 1.                          | Discuss purpose and action of the medication.                                                                                                                              |
| 2.                          | Take off the dust cap.                                                                                                                                                     |
| 3.                          | <i>Firmly shake the bottle.*</i>                                                                                                                                           |
| 4.                          | Place forefinger and middle finger on both sides of the nozzle and place thumb underneath the bottle.                                                                      |
| 5.                          | Point the nozzle upwards and away from yourself.                                                                                                                           |
| 6.                          | Squirt a few sprays into the air until you see a cloud of mist.                                                                                                            |
| 7.                          | <i>Blow the nose or rinse the nose with saline if the nose is clogged.*</i>                                                                                                |
| <b>Administration</b>       |                                                                                                                                                                            |
| 8.                          | Place forefinger and middle finger on both sides of the nozzle and place thumb underneath the bottle.                                                                      |
| 9.                          | A. Keep the head upright and place the nozzle in the nose.<br>B. Use the right hand for spraying in the left nostril, and the left hand for spraying in the right nostril. |
| 10.                         | <i>Point the end of the nozzle slightly outwards, away from the centre ridge of the nose.*</i>                                                                             |
| 11.                         | Close the other nostril with your opposite hand.                                                                                                                           |
| 12.                         | <i>Squirt a spray of mist in the nose while breathing in.*</i>                                                                                                             |
| 13.                         | <i>Breathe out through the mouth.*</i>                                                                                                                                     |
| 14.                         | Repeat steps 8 through 13 for the other nostril.                                                                                                                           |
| 15.                         | If two sprays per nostril are prescribed, repeat steps 8 through 14 for both nostrils.                                                                                     |
| 16.                         | Replace the dust cap.                                                                                                                                                      |
| <b>Cleaning</b>             |                                                                                                                                                                            |
| 17.                         | Wipe the nozzle with a tissue or handkerchief after every use.                                                                                                             |
| 18.                         | Extensively wash the nozzle once a week:                                                                                                                                   |
| 19.                         | Take off the dust cap and nozzle.                                                                                                                                          |
| 20.                         | Rinse the dust cap and nozzle with warm water.                                                                                                                             |
| 21.                         | Shake off water.                                                                                                                                                           |
| 22.                         | Air dry the dust cap and nozzle.                                                                                                                                           |
| 23.                         | Replace the nozzle.                                                                                                                                                        |
| 24.                         | Firmly shake the bottle.                                                                                                                                                   |
| 25.                         | Squirt a few sprays into the air until you see a cloud of mist.                                                                                                            |
| 26.                         | Replace the dust cap.                                                                                                                                                      |
| <b>Points for attention</b> |                                                                                                                                                                            |
| 27.                         | If the nozzle does not spray properly, perform the cleaning steps. If this does not work, take the spray to the pharmacy. Never puncture the opening.                      |
| 28.                         | Check the expiry date on the package and the expiry date after opening.                                                                                                    |

\* *Essential steps*

**Table 2. Participant characteristics**

| Variable                                                    | Overall (n = 75) |
|-------------------------------------------------------------|------------------|
| <b>Healthcare worker, n (%)</b>                             |                  |
| Pharmacist assistant                                        | 20 (26)          |
| General practitioner                                        | 20 (26)          |
| Paediatrician                                               | 20 (26)          |
| ENT physician                                               | 15 (20)          |
| <b>Gender, n (%)</b>                                        |                  |
| Male                                                        | 27 (36)          |
| Female                                                      | 48 (64)          |
| <b>Age (mean), range (95% CI)</b>                           |                  |
|                                                             | 45.2 ±11         |
| <b>Years of professional practice, n (%)</b>                |                  |
| 1 – 5 years                                                 | 18 (24)          |
| 5 – 10 years                                                | 12 (16)          |
| 10 – 20 years                                               | 22 (29)          |
| > 20 years                                                  | 23 (31)          |
| <b>Number of INCS prescriptions per week, n (%)</b>         |                  |
| 0 times                                                     | 20 (27)          |
| < 1 time                                                    | 19 (25)          |
| 1 – 4 times                                                 | 17 (23)          |
| 4 – 8 times                                                 | 5 (7)            |
| > 8 times                                                   | 14 (19)          |
| <b>Number of INCS instructions per week, n (%)</b>          |                  |
| < 1 time                                                    | 24 (32)          |
| 1 – 4 times                                                 | 27 (36)          |
| 4 – 8 times                                                 | 9 (12)           |
| > 8 times                                                   | 15 (20)          |
| <b>Number of checks on INCS inhalations per week, n (%)</b> |                  |
| < 1 time                                                    | 62 (83)          |
| 1 – 4 times                                                 | 15 (14)          |
| 4 – 8 times                                                 | 2 (3)            |
| > 8 times                                                   | 0 (0)            |
| <b>Use of information material, n (%)</b>                   |                  |
| Yes                                                         | 19 (25)          |
| No                                                          | 56 (75)          |

**Table 3. Difference in total score checklist**

| Healthcare worker    | N  | Median | Mean | Mean rank          | P-value between groups* |
|----------------------|----|--------|------|--------------------|-------------------------|
| Pharmacist assistant | 20 | 16     | 16,2 | 54.58 <sup>a</sup> | 0.001                   |
| General practitioner | 20 | 13,5   | 13,3 | 30.98              |                         |
| Paediatrician        | 20 | 14     | 13,8 | 34.85              |                         |
| ENT physician        | 15 | 12     | 13,1 | 29.47              |                         |

Tested using Kruskal-Wallis test (post hoc Mann-Whitney U) \*P < 0.05. <sup>a</sup>Significant difference compared with general practitioners, paediatricians and ENT physicians.

For peer review only

**Table 4. Number of well-executed steps protocol**

| <b>Preparation</b>          |                                                                                                                                                       | <b>n (%)</b> |
|-----------------------------|-------------------------------------------------------------------------------------------------------------------------------------------------------|--------------|
| 1.                          | Discuss purpose and action of the medication.                                                                                                         | 75 (100)     |
| 2.                          | Take off the dust cap.                                                                                                                                | 75 (100)     |
| 3.                          | <i>Firmly shake the bottle.*</i>                                                                                                                      | 61 (81)      |
| 4.                          | Place forefinger and middle finger on both sides of the nozzle and place thumb underneath the bottle.                                                 | 58 (77)      |
| 5.                          | Point the nozzle upwards and away from yourself.                                                                                                      | 44 (59)      |
| 6.                          | Squirt a few sprays into the air until you see a cloud of mist.                                                                                       | 44 (59)      |
| 7.                          | <i>Blow the nose or rinse the nose with saline if the nose is clogged.*</i>                                                                           | 46 (61)      |
| <b>Administration</b>       |                                                                                                                                                       | <b>n (%)</b> |
| 8.                          | Place forefinger and middle finger on both sides of the nozzle and place thumb underneath the bottle.                                                 | 60 (80)      |
| 9.                          | A. Keep the head upright and place the nozzle in the nose.                                                                                            | 49 (65)      |
|                             | B. Use the right hand for spraying in the left nostril, and the left hand for spraying in the right nostril.                                          | 43 (57)      |
| 10.                         | <i>Point the end of the nozzle slightly outwards, away from the centre ridge of the nose.*</i>                                                        | 66 (88)      |
| 11.                         | Close the other nostril with your opposite hand.                                                                                                      | 33 (44)      |
| 12.                         | <i>Squirt a spray of mist in the nose while breathing in.*</i>                                                                                        | 69 (92)      |
| 13.                         | <i>Breathe out through the mouth.*</i>                                                                                                                | 57 (76)      |
| 14.                         | Repeat steps 8 through 13 for the other nostril.                                                                                                      | 75 (100)     |
| 15.                         | If two sprays per nostril are prescribed, repeat steps 11 through 16 for both nostrils.                                                               | 75 (100)     |
| 16.                         | Replace the dust cap.                                                                                                                                 | 75 (100)     |
| <b>Cleaning</b>             |                                                                                                                                                       | <b>n (%)</b> |
| 17.                         | Wipe the nozzle with a tissue or handkerchief after every use.                                                                                        | 38 (51)      |
| 18.                         | Extensively wash the nozzle once a week:                                                                                                              | 1 (1)        |
| 19.                         | Take off the dust cap and nozzle.                                                                                                                     | 1 (1)        |
| 20.                         | Rinse the dust cap and nozzle with warm water.                                                                                                        | 4 (6)        |
| 21.                         | Shake off water.                                                                                                                                      | 1 (1)        |
| 22.                         | Air dry the dust cap and nozzle.                                                                                                                      | 1 (1)        |
| 23.                         | Replace the nozzle.                                                                                                                                   | 1 (1)        |
| 24.                         | Firmly shake the bottle.                                                                                                                              | 1 (1)        |
| 25.                         | Squirt a few sprays into the air until you see a cloud of mist.                                                                                       | 1 (1)        |
| 26.                         | Replace the dust cap.                                                                                                                                 | 1 (1)        |
| <b>Points for attention</b> |                                                                                                                                                       | <b>n (%)</b> |
| 27.                         | If the nozzle does not spray properly, perform the cleaning steps. If this does not work, take the spray to the pharmacy. Never puncture the opening. | 13 (17)      |
| 28.                         | Check the expiry date on the package and the expiry date after opening.                                                                               | 11 (15)      |

\* Essential steps

**Table 5. Scientifically and non-scientifically based steps in the corticosteroid nasal spray protocol**

| Scientifically based steps                                                                                                                                                                                                                                                                                                                                                                                                                                                                   | Non-scientifically based steps                                                                                                                                                                                                                                                                                                                                                              |
|----------------------------------------------------------------------------------------------------------------------------------------------------------------------------------------------------------------------------------------------------------------------------------------------------------------------------------------------------------------------------------------------------------------------------------------------------------------------------------------------|---------------------------------------------------------------------------------------------------------------------------------------------------------------------------------------------------------------------------------------------------------------------------------------------------------------------------------------------------------------------------------------------|
| <ul style="list-style-type: none"> <li>- Blow the nose or rinse the nose with saline if the nose is clogged.<sup>19</sup></li> <li>- Keep the head upright.<sup>10,20</sup></li> <li>- Use the right hand for spraying in the left nostril, and the left hand for spraying in the right nostril.<sup>12</sup></li> <li>- Point the end of the nozzle slightly outwards, away from the centre ridge of the nose.</li> <li>- Squirt a spray of mist in the nose while breathing in.</li> </ul> | <ul style="list-style-type: none"> <li>- Firmly shake the bottle.</li> <li>- Squirt a few sprays into the air until you see a cloud of mist.</li> <li>- Close the other nostril with your opposite hand.</li> <li>- Breathe out through the mouth.</li> <li>- Wipe the nozzle with a tissue or handkerchief after every use.</li> <li>- Extensively wash the nozzle once a week.</li> </ul> |

**Figure 1. Median score checklist per stage, per group of healthcare workers**

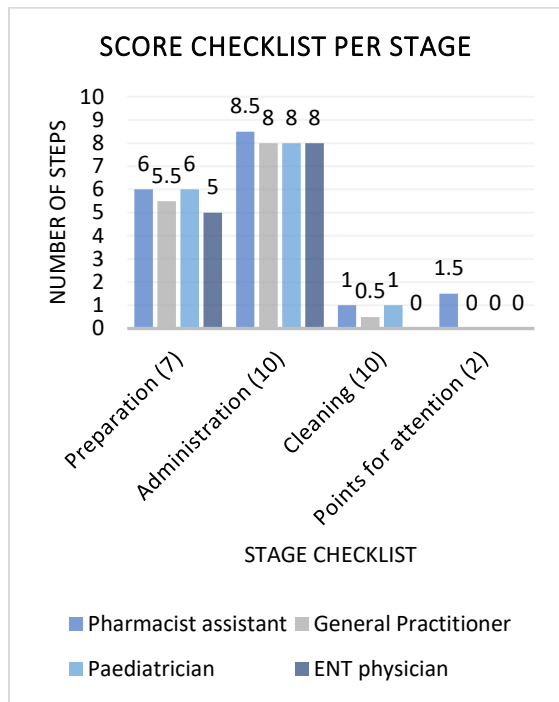

review only

## Reporting checklist for cross sectional study.

|                            |                     | Reporting Item                                                                                                                                                                                                                                                   | Page Number |
|----------------------------|---------------------|------------------------------------------------------------------------------------------------------------------------------------------------------------------------------------------------------------------------------------------------------------------|-------------|
| <b>Title and abstract</b>  |                     |                                                                                                                                                                                                                                                                  |             |
| Title                      | <a href="#">#1a</a> | Indicate the study's design with a commonly used term in the title or the abstract                                                                                                                                                                               | 1           |
| Abstract                   | <a href="#">#1b</a> | Provide in the abstract an informative and balanced summary of what was done and what was found                                                                                                                                                                  | 2           |
| <b>Introduction</b>        |                     |                                                                                                                                                                                                                                                                  |             |
| Background / rationale     | <a href="#">#2</a>  | Explain the scientific background and rationale for the investigation being reported                                                                                                                                                                             | 3           |
| Objectives                 | <a href="#">#3</a>  | State specific objectives, including any prespecified hypotheses                                                                                                                                                                                                 | 3           |
| <b>Methods</b>             |                     |                                                                                                                                                                                                                                                                  |             |
| Study design               | <a href="#">#4</a>  | Present key elements of study design early in the paper                                                                                                                                                                                                          | 3           |
| Setting                    | <a href="#">#5</a>  | Describe the setting, locations, and relevant dates, including periods of recruitment, exposure, follow-up, and data collection                                                                                                                                  | 3           |
| Eligibility criteria       | <a href="#">#6a</a> | Give the eligibility criteria, and the sources and methods of selection of participants.                                                                                                                                                                         | 3           |
|                            | <a href="#">#7</a>  | Clearly define all outcomes, exposures, predictors, potential confounders, and effect modifiers. Give diagnostic criteria, if applicable                                                                                                                         | 3           |
| Data sources / measurement | <a href="#">#8</a>  | For each variable of interest give sources of data and details of methods of assessment (measurement). Describe comparability of assessment methods if there is more than one group. Give information separately for exposed and unexposed groups if applicable. | 3           |
| Bias                       | <a href="#">#9</a>  | Describe any efforts to address potential sources of bias                                                                                                                                                                                                        | 3           |
| Study size                 | <a href="#">#10</a> | Explain how the study size was arrived at                                                                                                                                                                                                                        | 3           |

|    |                  |                      |                                                              |   |
|----|------------------|----------------------|--------------------------------------------------------------|---|
| 1  |                  |                      |                                                              |   |
| 2  |                  |                      |                                                              |   |
| 3  | Quantitative     | <a href="#">#11</a>  | Explain how quantitative variables were handled in the       | 3 |
| 4  | variables        |                      | analyses. If applicable, describe which groupings were       |   |
| 5  |                  |                      | chosen, and why                                              |   |
| 6  |                  |                      |                                                              |   |
| 7  |                  |                      |                                                              |   |
| 8  | Statistical      | <a href="#">#12a</a> | Describe all statistical methods, including those used to    | 3 |
| 9  | methods          |                      | control for confounding                                      |   |
| 10 |                  |                      |                                                              |   |
| 11 | Statistical      | <a href="#">#12b</a> | Describe any methods used to examine subgroups and           | 3 |
| 12 | methods          |                      | interactions                                                 |   |
| 13 |                  |                      |                                                              |   |
| 14 | Statistical      | <a href="#">#12c</a> | Explain how missing data were addressed                      | 3 |
| 15 | methods          |                      |                                                              |   |
| 16 |                  |                      |                                                              |   |
| 17 |                  |                      |                                                              |   |
| 18 | Statistical      | <a href="#">#12d</a> | If applicable, describe analytical methods taking account of | 3 |
| 19 | methods          |                      | sampling strategy                                            |   |
| 20 |                  |                      |                                                              |   |
| 21 | Statistical      | <a href="#">#12e</a> | Describe any sensitivity analyses                            | 3 |
| 22 | methods          |                      |                                                              |   |
| 23 |                  |                      |                                                              |   |
| 24 |                  |                      |                                                              |   |
| 25 | <b>Results</b>   |                      |                                                              |   |
| 26 |                  |                      |                                                              |   |
| 27 | Participants     | <a href="#">#13a</a> | Report numbers of individuals at each stage of study—eg      | 4 |
| 28 |                  |                      | numbers potentially eligible, examined for eligibility,      |   |
| 29 |                  |                      | confirmed eligible, included in the study, completing        |   |
| 30 |                  |                      | follow-up, and analysed. Give information separately for     |   |
| 31 |                  |                      | exposed and unexposed groups if applicable.                  |   |
| 32 |                  |                      |                                                              |   |
| 33 |                  |                      |                                                              |   |
| 34 | Participants     | <a href="#">#13b</a> | Give reasons for non-participation at each stage             | 4 |
| 35 |                  |                      |                                                              |   |
| 36 | Participants     | <a href="#">#13c</a> | Consider use of a flow diagram                               |   |
| 37 |                  |                      |                                                              |   |
| 38 | Descriptive data | <a href="#">#14a</a> | Give characteristics of study participants (eg demographic,  | 4 |
| 39 |                  |                      | clinical, social) and information on exposures and potential |   |
| 40 |                  |                      | confounders. Give information separately for exposed and     |   |
| 41 |                  |                      | unexposed groups if applicable.                              |   |
| 42 |                  |                      |                                                              |   |
| 43 |                  |                      |                                                              |   |
| 44 | Descriptive data | <a href="#">#14b</a> | Indicate number of participants with missing data for each   | 4 |
| 45 |                  |                      | variable of interest                                         |   |
| 46 |                  |                      |                                                              |   |
| 47 |                  |                      |                                                              |   |
| 48 | Outcome data     | <a href="#">#15</a>  | Report numbers of outcome events or summary measures.        | 4 |
| 49 |                  |                      | Give information separately for exposed and unexposed        |   |
| 50 |                  |                      | groups if applicable.                                        |   |
| 51 |                  |                      |                                                              |   |
| 52 | Main results     | <a href="#">#16a</a> | Give unadjusted estimates and, if applicable, confounder-    | 4 |
| 53 |                  |                      | adjusted estimates and their precision (eg, 95% confidence   |   |
| 54 |                  |                      | interval). Make clear which confounders were adjusted for    |   |
| 55 |                  |                      | and why they were included                                   |   |
| 56 |                  |                      |                                                              |   |
| 57 |                  |                      |                                                              |   |
| 58 |                  |                      |                                                              |   |
| 59 |                  |                      |                                                              |   |
| 60 |                  |                      |                                                              |   |



|    |                    |                      |                                                                                                                                                                  |   |
|----|--------------------|----------------------|------------------------------------------------------------------------------------------------------------------------------------------------------------------|---|
| 1  |                    |                      |                                                                                                                                                                  |   |
| 2  |                    |                      |                                                                                                                                                                  |   |
| 3  | Main results       | <a href="#">#16b</a> | Report category boundaries when continuous variables were categorized                                                                                            | 4 |
| 4  |                    |                      |                                                                                                                                                                  |   |
| 5  |                    |                      |                                                                                                                                                                  |   |
| 6  | Main results       | <a href="#">#16c</a> | If relevant, consider translating estimates of relative risk into absolute risk for a meaningful time period                                                     | 4 |
| 7  |                    |                      |                                                                                                                                                                  |   |
| 8  |                    |                      |                                                                                                                                                                  |   |
| 9  |                    |                      |                                                                                                                                                                  |   |
| 10 | Other analyses     | <a href="#">#17</a>  | Report other analyses done—e.g., analyses of subgroups and interactions, and sensitivity analyses                                                                | 4 |
| 11 |                    |                      |                                                                                                                                                                  |   |
| 12 |                    |                      |                                                                                                                                                                  |   |
| 13 | <b>Discussion</b>  |                      |                                                                                                                                                                  |   |
| 14 |                    |                      |                                                                                                                                                                  |   |
| 15 | Key results        | <a href="#">#18</a>  | Summarise key results with reference to study objectives                                                                                                         | 4 |
| 16 |                    |                      |                                                                                                                                                                  |   |
| 17 | Limitations        | <a href="#">#19</a>  | Discuss limitations of the study, taking into account sources of potential bias or imprecision. Discuss both direction and magnitude of any potential bias.      | 5 |
| 18 |                    |                      |                                                                                                                                                                  |   |
| 19 |                    |                      |                                                                                                                                                                  |   |
| 20 |                    |                      |                                                                                                                                                                  |   |
| 21 |                    |                      |                                                                                                                                                                  |   |
| 22 | Interpretation     | <a href="#">#20</a>  | Give a cautious overall interpretation considering objectives, limitations, multiplicity of analyses, results from similar studies, and other relevant evidence. | 5 |
| 23 |                    |                      |                                                                                                                                                                  |   |
| 24 |                    |                      |                                                                                                                                                                  |   |
| 25 |                    |                      |                                                                                                                                                                  |   |
| 26 |                    |                      |                                                                                                                                                                  |   |
| 27 | Generalisability   | <a href="#">#21</a>  | Discuss the generalisability (external validity) of the study results                                                                                            | 5 |
| 28 |                    |                      |                                                                                                                                                                  |   |
| 29 |                    |                      |                                                                                                                                                                  |   |
| 30 | <b>Other</b>       |                      |                                                                                                                                                                  |   |
| 31 | <b>Information</b> |                      |                                                                                                                                                                  |   |
| 32 |                    |                      |                                                                                                                                                                  |   |
| 33 |                    |                      |                                                                                                                                                                  |   |
| 34 | Funding            | <a href="#">#22</a>  | Give the source of funding and the role of the funders for the present study and, if applicable, for the original study on which the present article is based    | 7 |
| 35 |                    |                      |                                                                                                                                                                  |   |
| 36 |                    |                      |                                                                                                                                                                  |   |
| 37 |                    |                      |                                                                                                                                                                  |   |

None The STROBE checklist is distributed under the terms of the Creative Commons Attribution License CC-BY. This checklist can be completed online using <https://www.goodreports.org/>, a tool made by the [EQUATOR Network](#) in collaboration with [Penelope.ai](#)
